# Supplementary material
Source: PubMed Central journal article supplement (PMC8611116)
Supplement: NIHMS1720670-supplement-1720670_Sup.pdf [file NIHMS1720670-supplement-1720670_Sup.pdf]

| dwkg | weightbeofretxkg | weightweek1posttxkg | weightweek2posttxkg | crweek2posttxngdl | hgweek1posttxgdl | hgweek2posttxgdl |
|------|------------------|---------------------|---------------------|-------------------|------------------|------------------|
| 81   | 82.7             | 83.6                | 79.4                | 1.1               | 8.4              | 12.7             |
| 75.5 |                  | 78.4                | 78                  | 0.9               | 9.1              | 10.1             |
| 74.5 | 75.7             | 74                  | 72.2                | 1.4               | 11               | 11.4             |
| 60   | 60.7             | 60.5                | 58.6                | 1.2               | 10               | 8.7              |
| 45.5 | 46.7             | 47.3                | 47.4                | 1.2               | 11.4             | 12               |
| 53.3 |                  | 53.6                | 54.6                | 1.2               | 7.9              | 7.4              |
| 61   | 61.9             | 65                  | 59.6                | 1.1               | 11.9             | 11.3             |
| 122  | 123.7            | 125.1               | 127.6               | 0.9               | 10.6             | 9.6              |
| 67.5 | 67.8             | 65.2                | 64.9                | 1.4               | 11.5             | 12.1             |
| 92   | 93.18            | 95.9                | 97                  | 1.4               | 7.9              | 8.1              |
| 72   | 77.1             | 71.1                | 71.4                | 1.3               | 9.8              | 10.2             |
| 70   | 66.4             | 64                  | 62.4                | 1.1               | 8.9              | 9.1              |
| 56.5 | 58.7             | 61.6                | 56.5                | 1.5               | 7.6              | 8.7              |
| 89.5 | 93.8             | 95.2                | 92                  | 1.2               | 11.1             | 10.3             |
| 54   | 49.8             | 55.7                | 51.5                | 1.3               | 8.6              | 8.8              |
| 75   | 77.8             | 76.4                | 70.3                | 1.3               | 10.3             | 11.2             |
| 50   | 52.6             | 54.9                | 48.9                | 1.2               | 11.3             | 12               |
| 52.5 | 51.7             | 55                  | 58.3                | 1.3               | 8                | 8.9              |
| 85   | 84.7             | 83.4                | 83.4                | 1.3               | 10.8             | 9.8              |
| 75.5 | 76               | 71.6                | 70.8                | 1.1               | 9.2              | 8.5              |
| 80.4 | 83.1             | 96.9                | 83.2                | 1.1               | 7.7              | 10.7             |
| 59.8 | 59.6             | 59.3                | 57.8                | 1.5               | 8.8              | 7.7              |
| 59.5 | 60.1             | 59.3                | 60.2                | 1.1               | 10.7             | 10.5             |
| 70   | 70.2             | 69.9                | 69.6                | 1.3               |                  | 9.4              |
| 52.5 | 54.7             | 55.8                | 55.9                | 1.1               | 8.3              | 9.5              |
| 48   | 50.3             | 49.4                | 49.6                | 1                 | 7.8              | 8.6              |
| 61   | 58.9             | 57.8                | 57.5                | 1.1               | 12.8             | 11.2             |
| 71.5 | 71.5             | 73.9                | 74.8                | 1.5               | 10.2             | 10.2             |
| 88   | 90.7             | 91.4                | 89.7                | 1.5               | 10.6             | 10.5             |
| 85.5 | 84.3             | 86.9                | 87.9                | 1.3               | 11.4             | 10.7             |
| 64   | 66.1             | 63.2                | 62.8                | 1.2               | 11               | 11               |
| 72.6 | 73.5             | 78.1                | 74.3                | 1.3               | 11.8             | 11               |
| 70.5 | 71.6             | 69.4                | 69.8                | 1.4               |                  | 11               |

|       |       |       |        |      |      |      |
|-------|-------|-------|--------|------|------|------|
| 67    | 67.2  | 70.1  | 69.3   | 1    | 8.3  | 9.6  |
| 59    | 60.7  | 56.5  | 58.3   | 1    | 13.3 | 11.9 |
| 56    | 59    | 63.6  | 65     | 1.5  | 10.7 | 9.7  |
| 64.5  | 63    | 62.9  | 58.5   | 1.3  | 10.8 |      |
| 55    | 58.3  | 55.7  | 57.2   | 1.5  | 9.3  | 9.6  |
| 73.7  | 73.2  | 72.2  | 69.9   | 0.83 | 9.9  | 10   |
| 61    | 60.6  | 63.1  | 59.9   | 0.93 | 9.2  | 9.2  |
| 93    | 93.2  | 79.9  | 83.01  | 0.99 | 10.9 | 11.2 |
| 121.5 | 121.4 | 119.2 | 116.57 | 1.03 | 11.1 | 10.9 |
| 79    | 79    | 83.91 | 81.28  | 1.08 | 8.7  | 9.6  |
| 81    | 83    | 69.1  | 73.22  | 1.09 | 11.2 | 10.9 |
| 87.5  | 87.4  | 93.1  | 87.5   | 1.1  | 7.8  | 9.3  |
| 61.5  | 61.8  | 63.41 | 63.96  | 1.11 | 12.2 | 11.9 |
| 66.3  | 66.5  | 68.6  | 62     | 1.11 | 8    | 9.5  |
| 72    | 74.8  | 69.3  | 72     | 1.14 | 13.6 | 13   |
| 56    | 56.8  | 60.2  | 61.6   | 1.16 | 10.1 | 8.5  |
| 71.5  | 72.3  | 75    | 75.3   | 1.3  | 10.2 | 10.1 |
| 71.8  | 71.8  | 72.5  | 73.48  | 1.33 | 9.9  | 10.3 |
| 99    | 99.1  | 101.6 | 96.52  | 1.36 | 9.4  | 10.7 |
| 82    | 83.2  | 89    | 85.7   | 1.46 | 9.3  | 10.3 |
| 84.5  | 84    | 86.9  | 87     | 1.47 | 9.8  | 9.7  |
| 82    | 82.9  | 80.38 | 77.11  | 1.47 | 10.6 | 10.3 |
| 76.5  | 76.1  | 76.2  | 77.1   | 1.48 | 8.9  | 9    |
| 55    | 55.3  | 57.7  | 54     | 1.5  | 10.5 | 11.2 |
